# Supplementary material for: Origin, evolution, and global transmission of community-acquired Staphylococcus aureus ST8
Source: PubMed Central journal article supplement — Proc Natl Acad Sci U S A. 2017 Nov 20;114(49):E10596–604. doi: 10.1073/pnas.1702472114 (PMC5724248; doi:10.1073/pnas.1702472114), 2017-11-20
Supplement: pnas.201702472SI.pdf [file pnas.201702472SI.pdf]

Strauß et al. [www.pnas.org/cgi/content/short/1702472114](http://www.pnas.org/cgi/content/short/1702472114)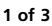

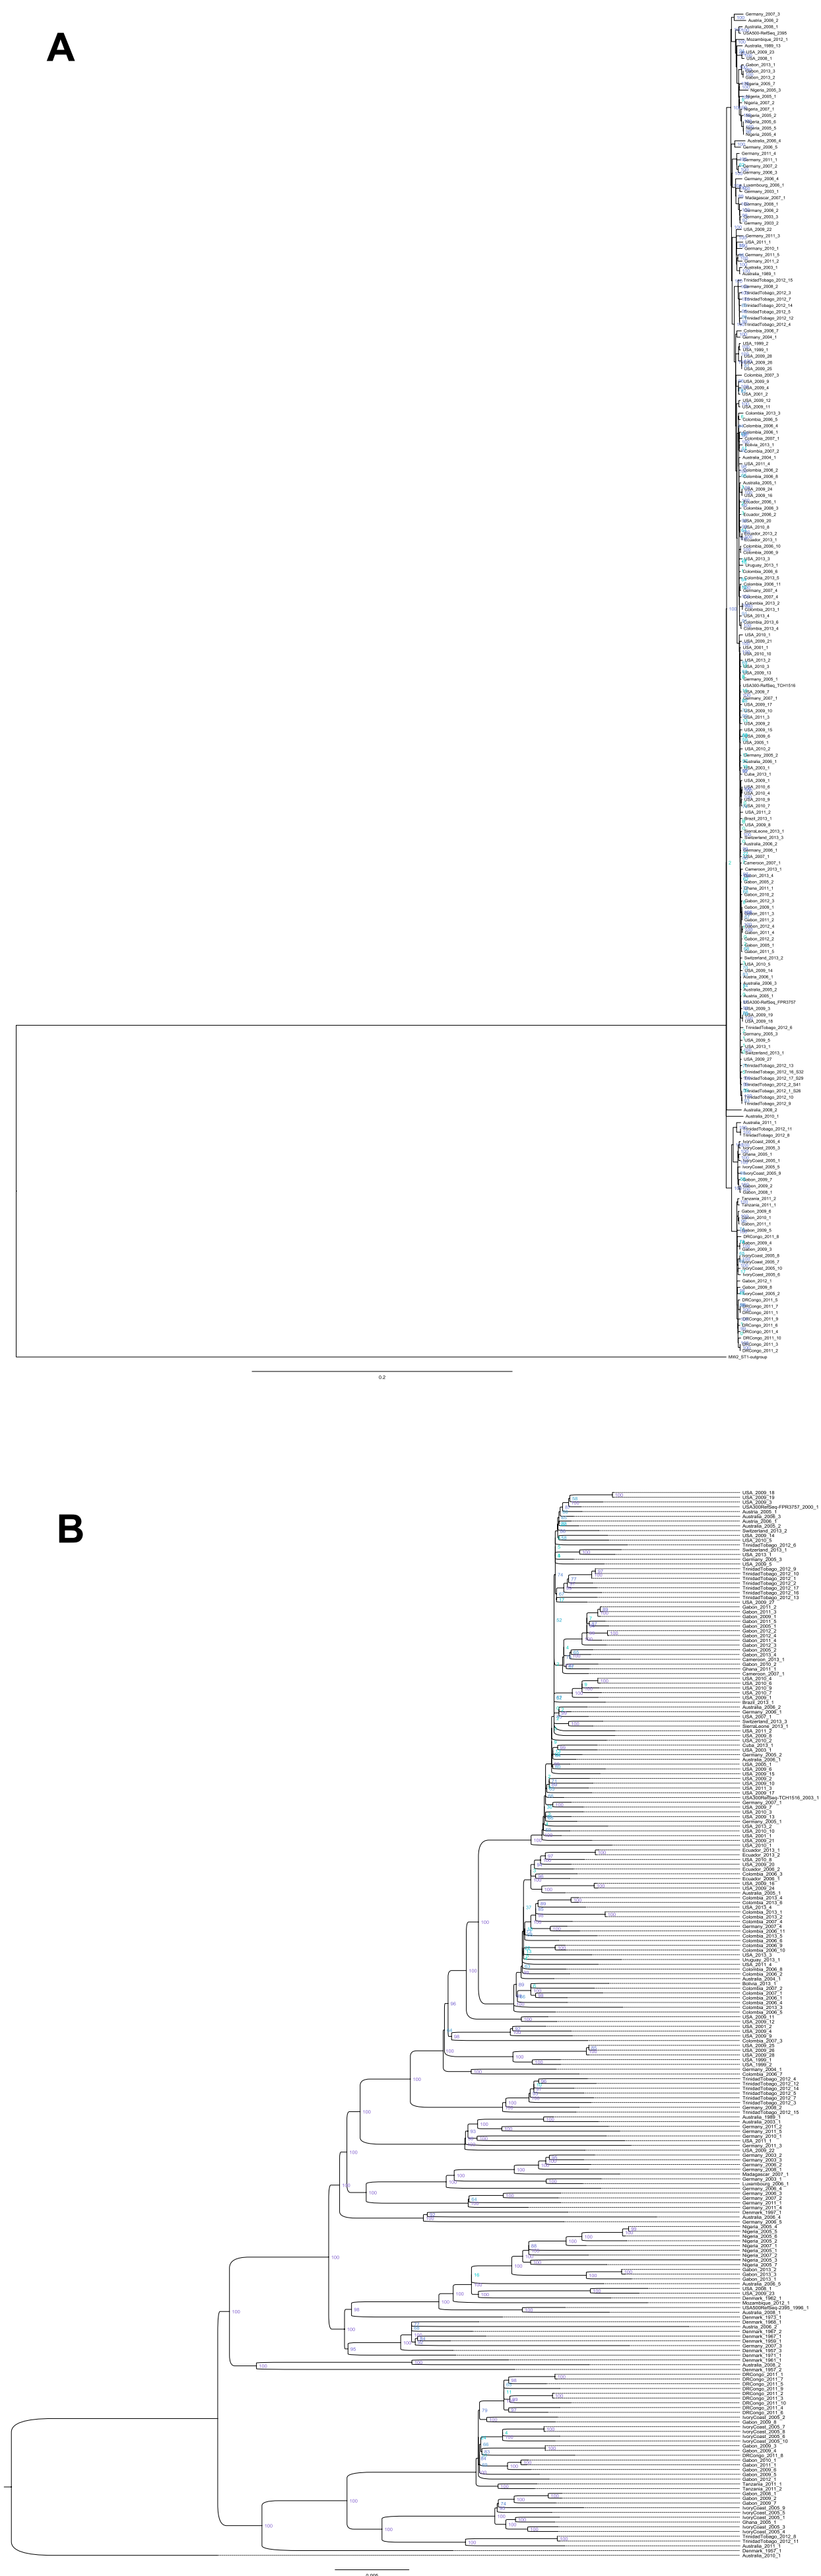

**Fig. S2.** Maximum Likelihood phylogeny of single nucleotide polymorphisms of the core genomes of 224 *Staphylococcus aureus* ST8 isolates, rooted with ST1 NCBI Reference Genome MW2 (accession no. BA000033.1). Bootstrap values are indicated on nodes and highlighted in color gradient from violet (high values) to green (low values). (A) Inclusion of MW2 in presentation. (B) Exclusion of MW2 in presentation.

PNAS

**Dataset S2.** Fasta sequences used as reference templates in the BLAST search for the identification of USA300-specific genes in *Staphylococcus aureus* whole genome sequences

**Dataset S3. Nomenclature of staphylococcal cassette chromosome *mec* subtyping**

**Dataset S4.** FASTA file containing the concatenated core genomic single nucleotide polymorphisms (SNPs) of 224 *Staphylococcus aureus* ST8 isolates analyzed in this study

**Dataset S5.** TXT file containing the .xml file generated by BEAUti 1.8.2 and used as input for BEAST

**Dataset S6.** To use this file, please exchange the .txt suffix with .kml and open with Google Earth

It visualizes the global spread of all 224 *Staphylococcus aureus* isolates analyzed in this study from 1854 to 2013 based on BEAST data. If Google Earth is not installed locally, please download it from <https://www.google.com/earth/download/gep/agree.html>.

USA300-NAE specific targets were created based on the genome of NCBI RefSeq USA300 genome FPR3757 (NC\_007793.1), USA300-SAE specific targets were created based on the genome of strain M121 (CP007670.1), the African USA300 clade specific targets were created based on the contig sequences of strain Gabon\_2009\_1 (SAMEA4081496) (annotation was done using the RAST system under [rast.nmpdr.org](http://rast.nmpdr.org) using default parameters), and the non-USA300 outgroup targets were created based on isolate C1768 (LAMT01000000).
